# Supplementary material for: The relationship between endogenous thymidine concentrations and [18F]FLT uptake in a range of preclinical tumour models
Source: PubMed Central journal article supplement (PMC4980847; doi:10.1186/s13550-016-0218-3), 2016-08-11
Supplement: 13550_2016_218_MOESM1_ESM.pdf [file 13550_2016_218_MOESM1_ESM.pdf]

1 *Journal:* EJNMMI Research  
2 *Title:* The relationship between endogenous thymidine concentrations and [<sup>18</sup>F]FLT uptake  
3 in a range of preclinical tumour models  
4 *Authors:* Kathrin Heinzmann<sup>1,8</sup>, Davina J Honess<sup>1</sup>, David Y Lewis<sup>1,7</sup>, Donna-Michelle Smith<sup>1</sup>,  
5 Christopher J Cawthorne<sup>2,9</sup>, Heather Keen<sup>3</sup>, Sandra Heskamp<sup>4</sup>, Sonja Schelhaas<sup>5</sup>, Timothy H  
6 Witney<sup>6,10</sup>, Dmitry Soloviev<sup>1,7</sup>, Kaye J Williams<sup>2,7</sup>, Andreas H Jacobs<sup>5</sup>, Eric O Aboagye<sup>6</sup>, John  
7 R Griffiths<sup>1</sup> and Kevin M Brindle<sup>1,7</sup>  
8 *Corresponding author:* Kevin M Brindle, D. Phil., Cancer Research UK Cambridge Institute,  
9 Li Ka Shing Centre, Robinson Way, Cambridge, CB2 0RE, UK. E-mail: kmb1001@cam.ac.uk

10

## 11 **ELECTRONIC SUPPLEMENTARY DETAILS**

12 The authors are members of the QuIC-ConCePT Consortium whose participants  
13 included: AstraZeneca, European Organisation for Research and Treatment of  
14 Cancer (EORTC), University of Cambridge, University of Manchester, Westfälische  
15 Wilhelms-Universität Münster, Radboud University Nijmegen Medical Center,  
16 Institut National de la Santé et de la Recherche Médical, Stichting Maastricht  
17 Radiation Oncology “Maastro Clinic”, VUmc Amsterdam, King’s College London,  
18 Universitair Ziekenhuis Antwerpen, Institute of Cancer Research – Royal Cancer  
19 Hospital, Erasmus Universitair Medisch Centrum Rotterdam, Imperial College of  
20 Science Technology and Medicine, Keosys S.A.S., Eidgenössische Technische  
21 Hochschule Zürich, Amgen NV, Eli Lilly and Company Ltd, GlaxoSmithKline  
22 Research & Development Limited, Merck KGa, Pfizer Limited, F.Hoffmann - La  
23 Roche Ltd, Sanofi-Aventis Research and Development

24

25

26

1 ELECTRONIC SUPPLEMENTARY FIGURES

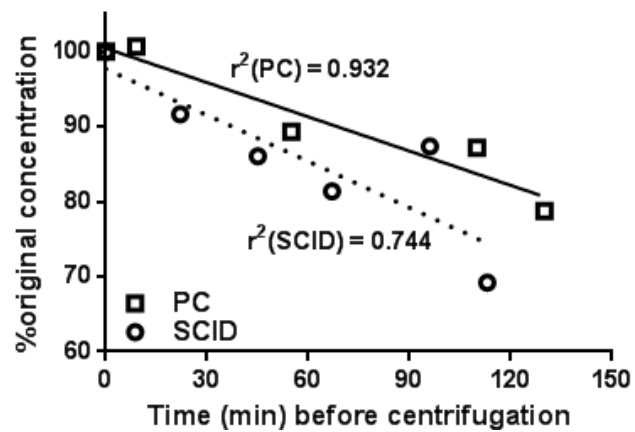

2

3

4 **Fig. S1** Thymidine is not stable in murine blood kept on ice. Blood samples taken by  
5 cardiac puncture were split immediately into two cooled Eppendorf tubes. One was  
6 centrifuged and the plasma frozen immediately after separation. The other was kept on  
7 ice for a period of up to 130 minutes before centrifugation and plasma collection and  
8 freezing. The thymidine concentration of each sample kept on ice is expressed relative to  
9 the value in the portion of the sample that was processed immediately. Data are  
10 presented for plasma from both SCID (circles) and PC (squares) mice at the CI. See Table 1  
11 for PC mouse genotype

12

13

14

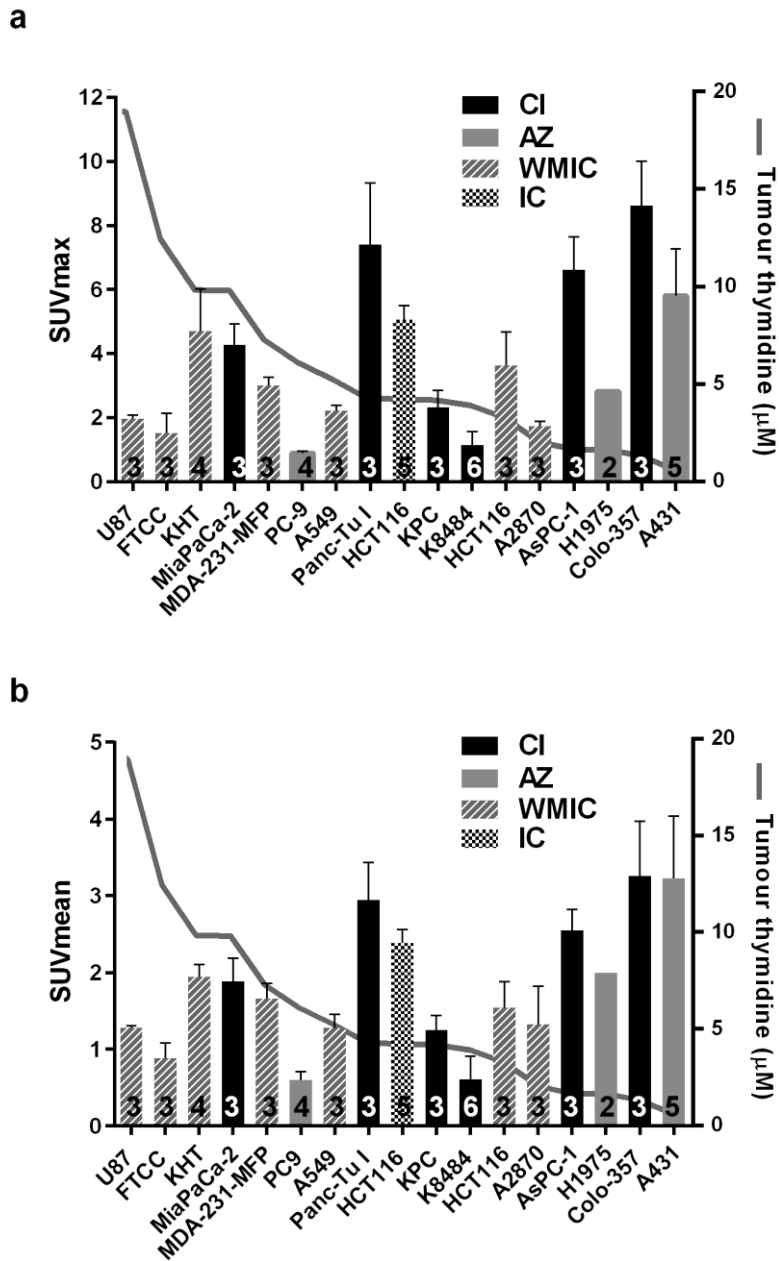

1

2

3 **Fig. S2** There was no correlation between tumour thymidine concentration with either  
 4 SUVmax (a) or (b) SUVmean. SUV data  $\pm$  SD is shown as a bar chart superimposed on a  
 5 plot of the respective thymidine concentrations. Left axes show uptake ratios; right axes  
 6 show thymidine concentrations. Numbers of animals are indicated on the columns.  
 7 Column fill indicates the centre supplying the tumour samples. Additional data (SUV and  
 8 thymidine data for FTCC, H1975 and A431) were added here as the tumour-to-liver (TTL)  
 9 uptake ratios for these tumours were not available

10

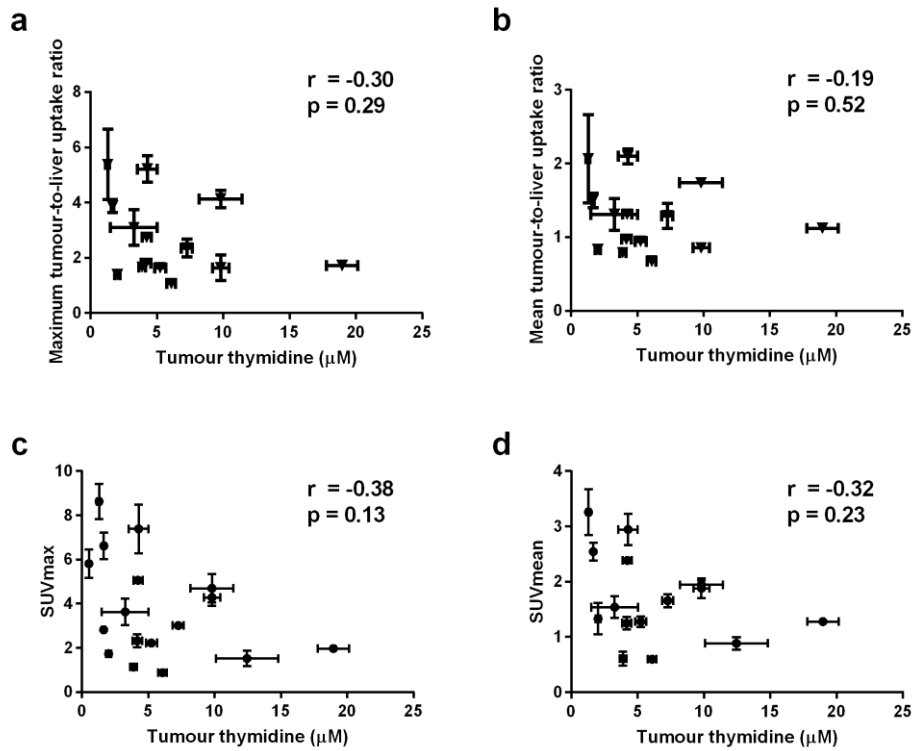

1

2 **Fig. S3** Tumour thymidine concentrations were not correlated with either maximum (a and  
 3 c) or mean [ $^{18}\text{F}$ ]FLT uptake (b and d). Panels (a and b) show TTL ratios, panels (c and d)  
 4 show SUV measurements. Data is expressed as mean  $\pm$  SEM

5

6

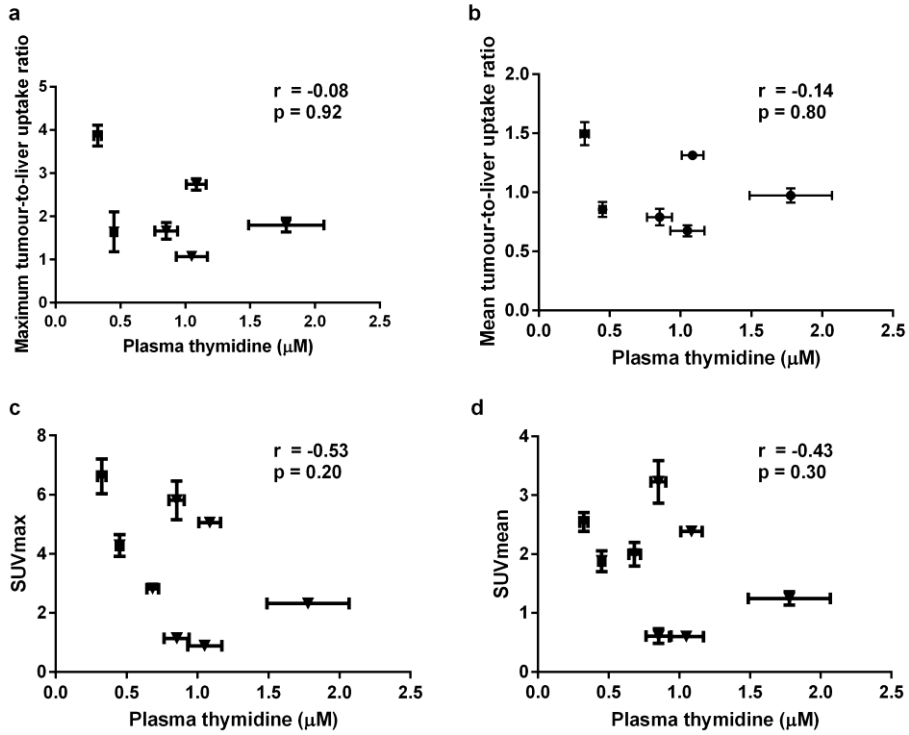

1

2 **Fig. S4** There was no correlation between plasma thymidine concentration and either  
 3 maximum (a) or mean (b) tumour-to-liver uptake ratio, or to SUVmax (c) or SUVmean (d).

4 Data are expressed as mean  $\pm$  SEM

5

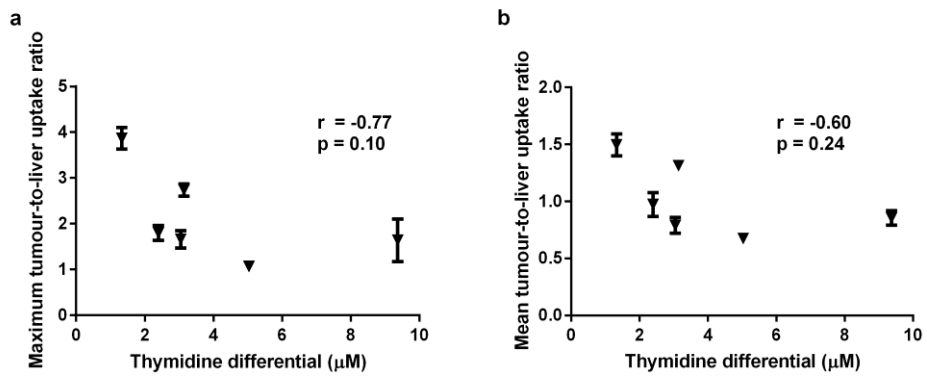

6

7 **Fig. S5** There was no correlation between the difference in tumour and plasma thymidine  
 8 concentrations and either the maximum (a) or mean (b) tumour-to-liver uptake ratio. The  
 9 differential was calculated by subtracting the mean plasma thymidine concentration from  
 10 the mean tumour thymidine concentration for each tumour model

11

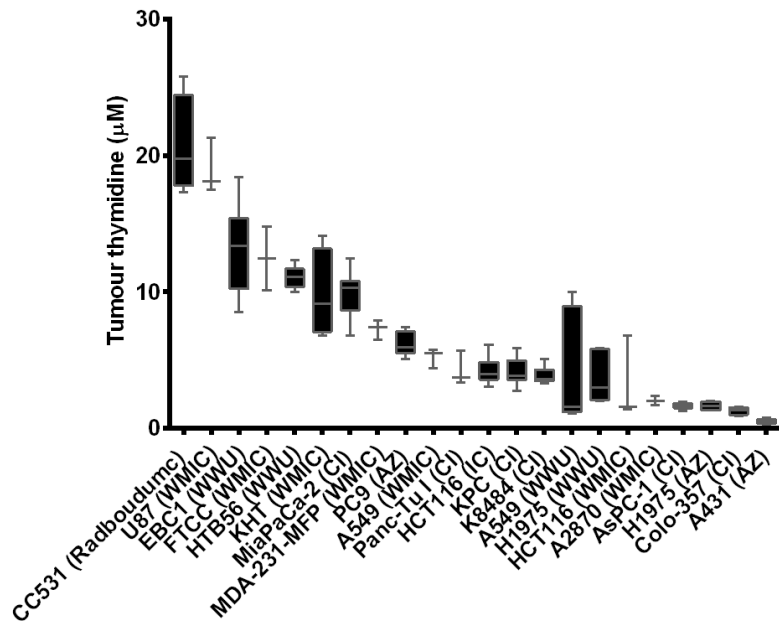

1  
2  
3  
4  
5  
6  
7  
8  
9  
10  
11  
12  
13  
14

**Fig. S6** Tumour thymidine concentrations varied across tumour models. The box and whisker plot shows the minimum, first quartile, median, third quartile and maximum

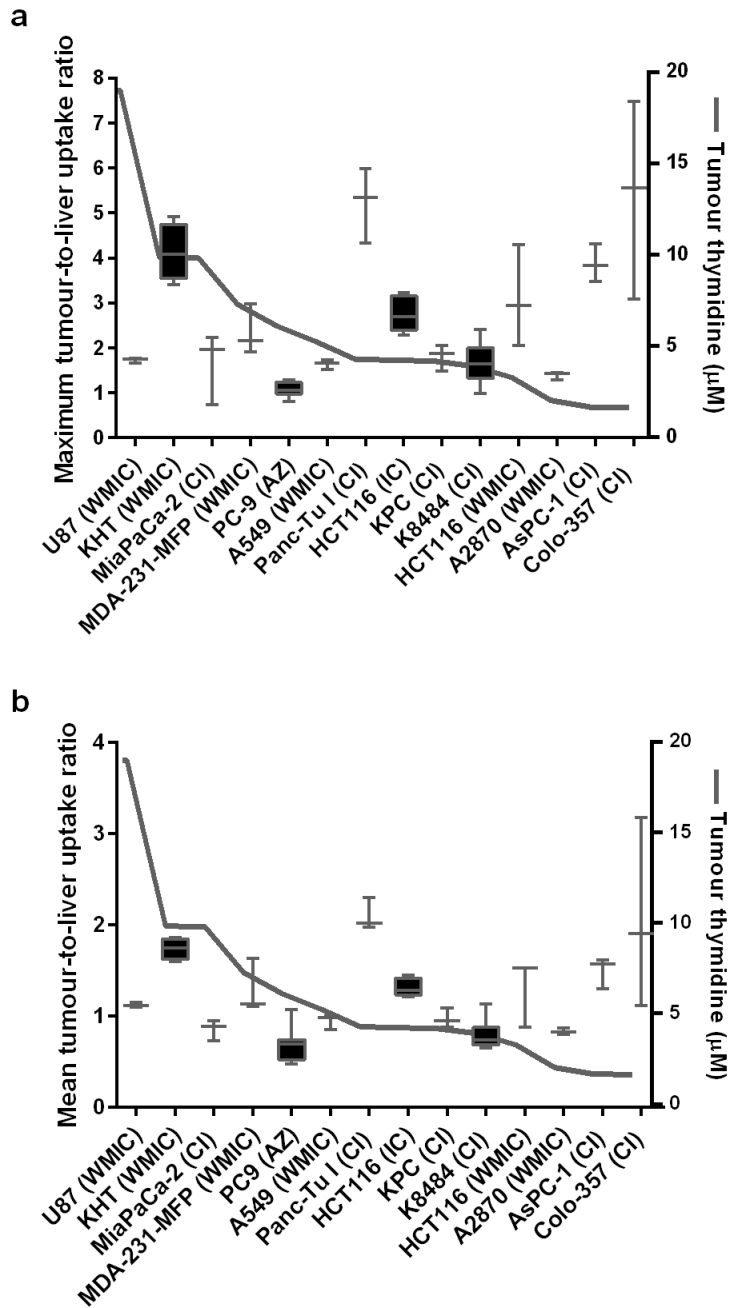

1

2 **Fig. S7** Tumour thymidine concentrations were not correlated with [18F]FLT uptake.  
 3 Tumour-to-liver (TTL) ratios are shown in a box and whisker plot displaying the minimum,  
 4 first quartile, median, third quartile and maximum. The plot is superimposed on a plot of  
 5 the respective tumour thymidine concentrations. Left axes show uptake ratios; right axes  
 6 show thymidine concentrations. Panel (a) shows TTLmax, panel (b) shows TTLmean

7

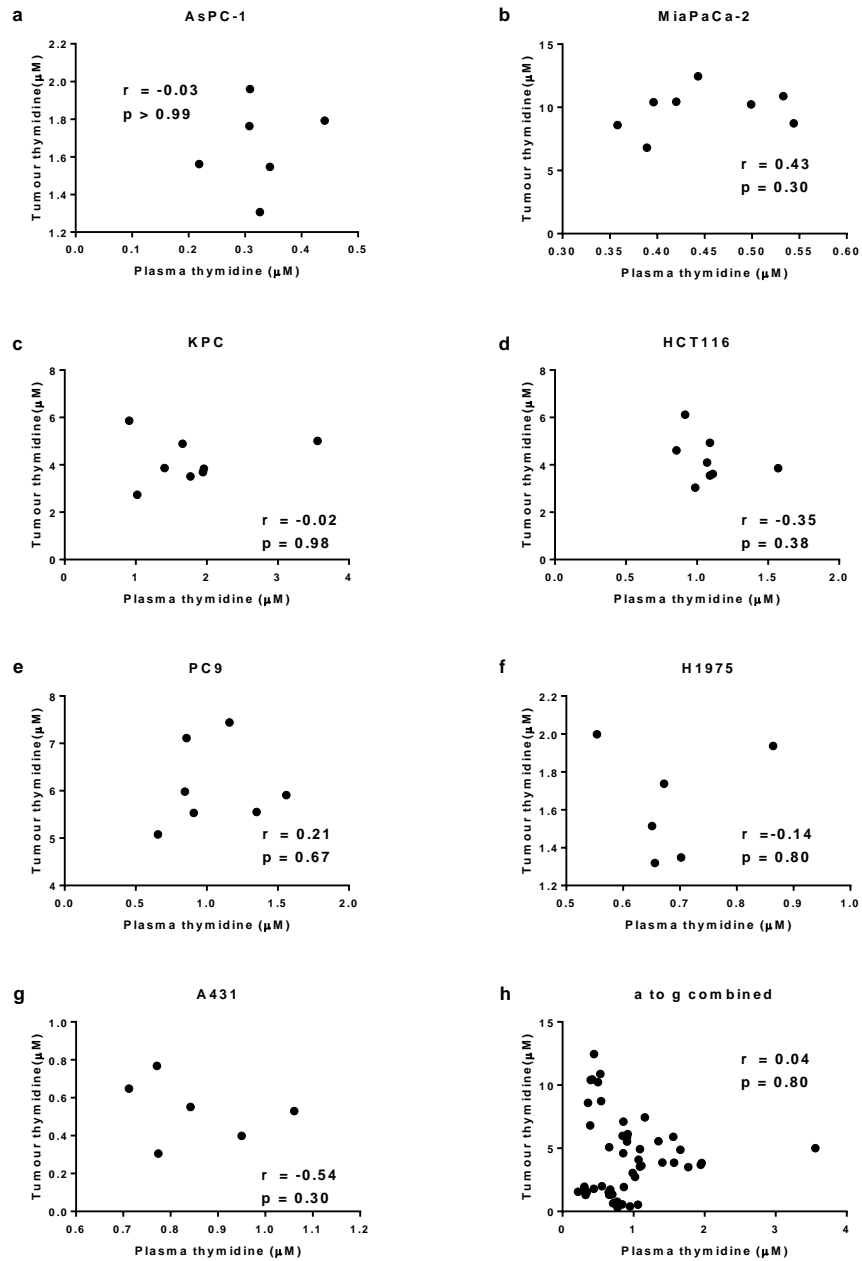

1

2

3 **Fig. S8** Tumour thymidine concentrations were not correlated with plasma thymidine

4 concentrations. Plasma and tumour thymidine concentrations were determined in the

5 same animal. Data from the various tumour models are plotted individually (a to g) and

6 with all data combined (h)

7

8



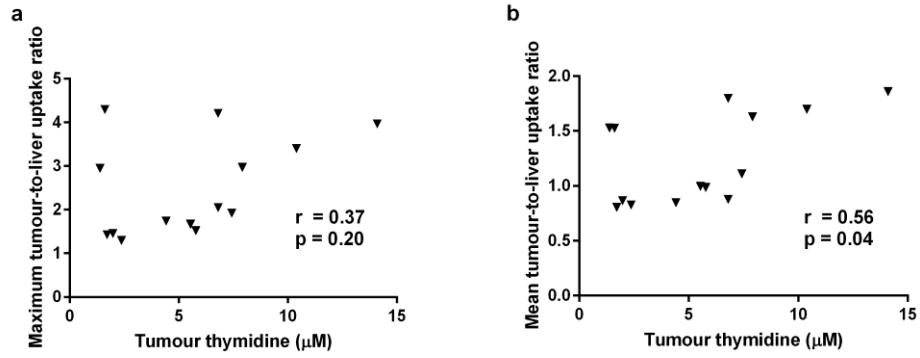

1

2

3 **Fig. S9** Correlation plots of tumour thymidine concentrations and either maximum (a) or  
 4 mean (b) tumour-to-liver uptake ratios for a subset of tumours where tumour thymidine  
 5 and [ $^{18}\text{F}$ ]FLT uptake were measured in the same animal (measurements made at WMIC).

**ESM Tables (a,b and c)** Values shown in Fig. 4, 6, S6 and S7 (Note: Percentiles are only quoted where n > 4)

| <b>(a) Tumour thymidine concentrations (<math>\mu\text{M}</math>)</b> |               |             |                |                   |                  |                   |             |               |              |                |               |
|-----------------------------------------------------------------------|---------------|-------------|----------------|-------------------|------------------|-------------------|-------------|---------------|--------------|----------------|---------------|
|                                                                       | K8484<br>(CI) | KPC<br>(CI) | AsPC-1<br>(CI) | MiaPaCa-2<br>(CI) | Colo-357<br>(CI) | Panc-Tu I<br>(CI) | PC9<br>(AZ) | H1975<br>(AZ) | A431<br>(AZ) | HCT116<br>(IC) | A549<br>(WWU) |
| n                                                                     | 7             | 8           | 6              | 8                 | 4                | 3                 | 7           | 6             | 6            | 8              | 7             |
| Mean                                                                  | 3.902         | 4.174       | 1.655          | 9.818             | 1.294            | 4.278             | 6.086       | 1.642         | 0.534        | 4.229          | 3.689         |
| Std. Deviation                                                        | 0.635         | 1.002       | 0.231          | 1.723             | 0.293            | 1.263             | 0.869       | 0.293         | 0.167        | 0.972          | 3.960         |
| Minimum                                                               | 3.310         | 2.735       | 1.306          | 6.802             | 0.885            | 3.390             | 5.080       | 1.319         | 0.305        | 3.040          | 1.100         |
| 25% Percentile                                                        | 3.470         | 3.553       | 1.486          | 8.625             |                  |                   | 5.530       | 1.341         | 0.376        | 3.568          | 1.200         |
| Median                                                                | 3.619         | 3.849       | 1.662          | 10.32             | 1.368            | 3.720             | 5.910       | 1.626         | 0.541        | 3.980          | 1.600         |
| 75% Percentile                                                        | 4.300         | 4.979       | 1.834          | 10.78             |                  |                   | 7.110       | 1.952         | 0.678        | 4.850          | 8.940         |
| Maximum                                                               | 5.107         | 5.863       | 1.960          | 12.45             | 1.556            | 5.723             | 7.440       | 1.998         | 0.768        | 6.120          | 9.980         |

| <b>(a) Tumour thymidine concentrations (<math>\mu\text{M}</math>)</b> |               |                |                |                         |                        |                |                  |                 |               |                |               |
|-----------------------------------------------------------------------|---------------|----------------|----------------|-------------------------|------------------------|----------------|------------------|-----------------|---------------|----------------|---------------|
|                                                                       | EBC1<br>(WWU) | HTB56<br>(WWU) | H1975<br>(WWU) | CC531 (Rad-<br>boudumc) | MDA-231-<br>MFP (WMIC) | A549<br>(WMIC) | HCT116<br>(WMIC) | A2870<br>(WMIC) | U87<br>(WMIC) | FTCC<br>(WMIC) | KHT<br>(WMIC) |
| n                                                                     | 6             | 6              | 7              | 4                       | 3                      | 3              | 3                | 3               | 3             | 2              | 4             |
| Mean                                                                  | 13.13         | 11.08          | 3.629          | 20.65                   | 7.277                  | 5.247          | 3.267            | 2.020           | 18.97         | 12.45          | 9.808         |
| Std. Deviation                                                        | 3.361         | 0.796          | 1.727          | 3.650                   | 0.7223                 | 0.7259         | 3.062            | 0.3318          | 2.043         |                | 3.232         |
| Minimum                                                               | 8.500         | 10.00          | 2.000          | 17.30                   | 6.490                  | 4.420          | 1.390            | 1.710           | 17.50         | 10.10          | 6.800         |
| 25% Percentile                                                        | 10.23         | 10.38          | 2.100          |                         |                        |                |                  |                 |               |                |               |
| Median                                                                | 13.35         | 11.10          | 3.000          | 19.75                   | 7.430                  | 5.540          | 1.610            | 1.980           | 18.10         |                | 9.165         |
| 75% Percentile                                                        | 15.40         | 11.70          | 5.800          |                         |                        |                |                  |                 |               |                |               |
| Maximum                                                               | 18.40         | 12.30          | 5.900          | 25.80                   | 7.910                  | 5.780          | 6.800            | 2.370           | 21.30         | 14.80          | 14.10         |

**(b) Maximum tumour-to-liver uptake ratios**

|                | K8484<br>(CI) | KPC<br>(CI) | AsPC-1<br>(CI) | MiaPaCa-2<br>(CI) | Colo-357<br>(CI) | Panc-Tu I<br>(CI) | PC-9<br>(AZ) | MDA-231-       |               |                |                  |                 |               |               |
|----------------|---------------|-------------|----------------|-------------------|------------------|-------------------|--------------|----------------|---------------|----------------|------------------|-----------------|---------------|---------------|
|                |               |             |                |                   |                  |                   |              | HCT116<br>(IC) | MFP<br>(WMIC) | A549<br>(WMIC) | HCT116<br>(WMIC) | A2870<br>(WMIC) | U87<br>(WMIC) | KHT<br>(WMIC) |
| n              | 6             | 3           | 3              | 3                 | 3                | 3                 | 10           | 7              | 3             | 3              | 3                | 3               | 3             | 4             |
| Mean           | 1.66          | 1.80        | 3.87           | 1.64              | 5.38             | 5.22              | 1.07         | 2.74           | 2.35          | 1.64           | 3.10             | 1.39            | 1.72          | 4.13          |
| Std. Deviation | 0.47          | 0.29        | 0.42           | 0.80              | 2.20             | 0.83              | 0.16         | 0.36           | 0.55          | 0.11           | 1.13             | 0.09            | 0.06          | 0.63          |
| Minimum        | 0.992         | 1.49        | 3.48           | 0.73              | 3.09             | 4.34              | 0.796        | 2.29           | 1.92          | 1.52           | 2.05             | 1.29            | 1.65          | 3.40          |
| 25% Percentile | 1.32          |             |                |                   |                  |                   | 0.975        | 2.38           |               |                |                  |                 |               |               |
| Median         | 1.65          | 1.87        | 3.82           | 1.97              | 5.57             | 5.34              | 1.06         | 2.70           | 2.16          | 1.67           | 2.95             | 1.43            | 1.75          | 4.09          |
| 75% Percentile | 2.00          |             |                |                   |                  |                   | 1.23         | 3.15           |               |                |                  |                 |               |               |
| Maximum        | 2.40          | 2.05        | 4.31           | 2.23              | 7.48             | 5.99              | 1.28         | 3.23           | 2.97          | 1.74           | 4.29             | 1.46            | 1.77          | 4.93          |

**(c) Mean tumour-to-liver uptake ratios**

|                | K8484<br>(CI) | KPC<br>(CI) | AsPC-1<br>(CI) | MiaPaCa-2<br>(CI) | Colo-357<br>(CI) | Panc-Tu I<br>(CI) | PC9<br>(AZ) | MDA-231-       |               |                |                  |                 |               |               |
|----------------|---------------|-------------|----------------|-------------------|------------------|-------------------|-------------|----------------|---------------|----------------|------------------|-----------------|---------------|---------------|
|                |               |             |                |                   |                  |                   |             | HCT116<br>(IC) | MFP<br>(WMIC) | A549<br>(WMIC) | HCT116<br>(WMIC) | A2870<br>(WMIC) | U87<br>(WMIC) | KHT<br>(WMIC) |
| n              | 6             | 3           | 3              | 3                 | 3                | 3                 | 13          | 7              | 3             | 3              | 3                | 3               | 3             | 4             |
| Mean           | 0.790         | 0.972       | 1.496          | 0.854             | 2.067            | 2.099             | 0.716       | 1.312          | 1.291         | 0.944          | 1.310            | 0.831           | 1.120         | 1.739         |
| Std. Deviation | 0.174         | 0.106       | 0.1677         | 0.111             | 1.039            | 0.176             | 0.165       | 0.090          | 0.293         | 0.083          | 0.375            | 0.030           | 0.029         | 0.113         |
| Minimum        | 0.650         | 0.878       | 1.304          | 0.732             | 1.119            | 1.978             | 0.475       | 1.215          | 1.109         | 0.848          | 0.878            | 0.804           | 1.094         | 1.602         |
| 25% Percentile | 0.682         |             |                |                   |                  |                   | 0.521       | 1.232          |               |                |                  |                 |               |               |
| Median         | 0.736         | 0.953       | 1.569          | 0.885             | 1.905            | 2.018             | 0.694       | 1.282          | 1.135         | 0.986          | 1.526            | 0.827           | 1.116         | 1.747         |
| 75% Percentile | 0.877         |             |                |                   |                  |                   | 0.742       | 1.417          |               |                |                  |                 |               |               |
| Maximum        | 1.132         | 1.086       | 1.614          | 0.946             | 3.178            | 2.300             | 1.071       | 1.452          | 1.629         | 0.997          | 1.527            | 0.864           | 1.151         | 1.859         |
